# Supplementary material for: Insights on the virulence of swine respiratory tract mycoplasmas through genome-scale metabolic modeling
Source: Springer Nature journal article supplement (doi:10.1186/s12864-016-2644-z), 2016-05-13
Supplement: MOESM4 [file 12864_2016_2644_MOESM4_ESM.pdf]

## Transporters

Before the genome sequencing era, it was anticipated that Mollicutes, because of their small genomes, reduced metabolism and complex nutritional demands, should have a relative larger fraction of membrane transporters than large genome bacteria [Razin2002]. However, such expectations were not confirmed after the sequencing of several genomes; the transporter numbers seemed to be average when compared to other bacteria [Fraser1995, Himmelreich1996, Paulsen1998, Pollack2002].

An extensive search for transporters throughout all species was performed and is described below.

### **Active transporters**

Active transporters use a chemical, electrical or solar source to drive solute transport [Saier2000]. Although uncharged solutes, such as sugars and amino acids may cross the membrane coupled with protons, the proton motor force (pmf) detected in *A. laidlawii* was proposed to arise from proton pumps primarily from ATP hydrolysis [Cirillo1993]. Mycoplasmas in general, lacking both electron transport and a functional TCA cycle, use ATP as primary energy source, and in turn, have a great number of ATP-dependent transport systems (ATP binding cassette or ABC transport systems). ABC transporters are generally involved in a variety of substrates such as amino acids, sugars, peptides and toxins. In fermentative species of *Mycoplasma*, sugar is thought to be transported through group translocation transport systems (PEP:Pyruvate phosphotransferase systems or PTS). Import through a PTS results in phosphorylation of carbohydrate substrate whereas ABC transport does not modify the substrate (Fig ST1), which means that ABC transport of carbohydrates requires more energy than PTS transport [Buckwalter2012].

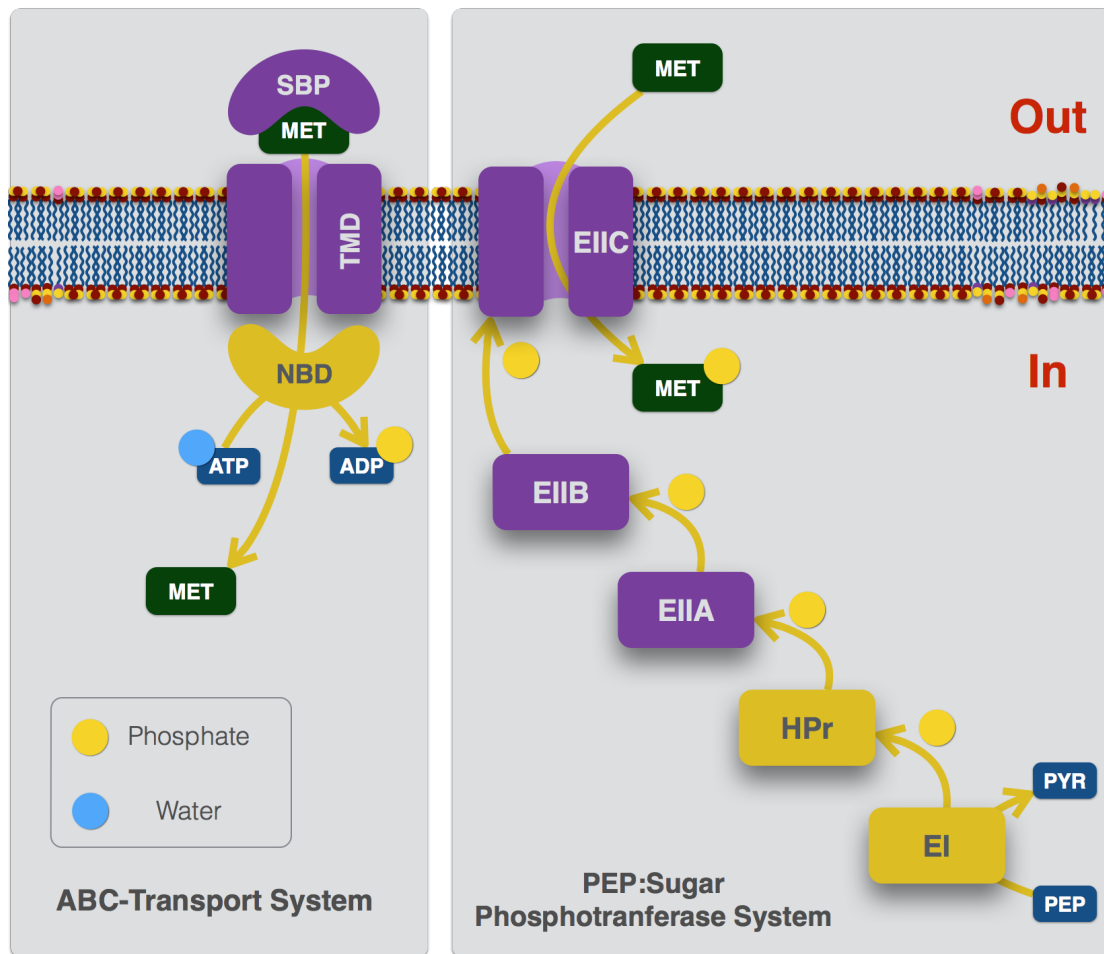

Figure ST1: Schematic representation of an ABC transport system and a PTS. Components that are common to other transport systems are depicted in yellow and specific-substrate proteins are depicted in purple. Substrate (MET) is depicted in green and cofactors in blue (ATP, ADP, PEP, PYR). (a) ABC import systems are composed of 3 separate portions, a substrate binding protein (SBP), two transmembrane domains (TMD, usually heterodimers) and two nucleotide binding domains (NBD, usually homodimers). (b) PTS is composed by two general proteins, phosphocarrier (HPr) and enzyme I (EI), common to all systems; Enzymes IIA (EIIA), IIB (EIIB) are cytoplasmic phosphocarriers and enzyme IIC (EIIC) forms a membrane channel.

### ABC transport systems:

ABC transporters are integral membrane proteins that enable active transport across the lipid membrane against a concentration gradient of substrates, by using energy of ATP hydrolysis [Moussatova2008]. ABC transporters are composed of two transmembrane permeases (TMDs), two nucleotide binding domains (NBDs), which are cytoplasmic proteins able to hydrolyze a nucleotide triphosphate and a substrate binding domain, usually a lipoprotein which is not necessary if the substrate is delivered by the lipid bilayer.

The results for the search of ABC transporters are summarized in table ST1, for one member of each species: *M. hyorhinis* strain HUB1 (MHRHUB1), *M. hyopneumoniae* strain 7448 and *M. flocculare* ATCC 27399. Complete systems had at least one TMD and one NBD that were either in the same gene or in separate genes. But, as proposed in other bacteria, several of the incomplete ABC systems may be functional, using components from the complete systems [Tchieu2001]. We also found a great number of lipoproteins with no assigned function in the neighborhood of some of these ABC cassettes. These conserved, but not characterized, proteins were proposed as possible substrate binding proteins whenever a SBP was missing from the cassette (Fig ST2).

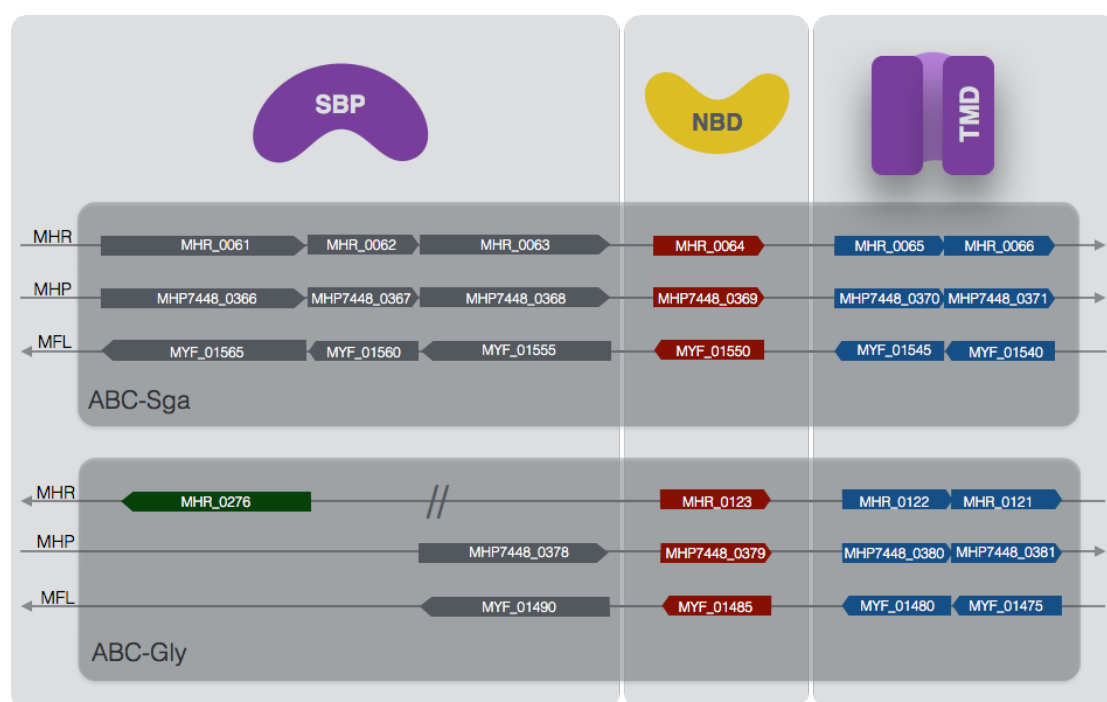

Figure ST2: Gene context and components of two ABC transport systems in *M. hyorhinis* (MHR), *M. hyopneumoniae* (MHP) and *M. flocculare* (MFL). Only one strain from each species was chosen (MHR strain HUB-1, MHP strain 7448, MFL ATCC 27399). The nonspecific sugar ABC transport system has three conserved lipoproteins upstream the ATP-binding protein, whereas the specific glycerol ABC transport system has only one substrate binding protein. In blue, annotated genes coding for transmembrane domain proteins; in red, annotated genes coding for nucleotide-binding proteins and in green, annotated genes coding for substrate binding protein. In deep grey, annotated genes coding for lipoproteins with unknown function; in this work these lipoproteins were proposed to act as substrate binding proteins, based on gene context.

Table ST1: ABC systems present in *M. hyorhinis*, *M. flocculare* and *M. hyopneumoniae*. Only three strains are presented here: MHRHUB1, MHP7448 and MFL27399.

| ABC-Systems                                 |                 |          | ABC Components |              |              |              |              |                               |
|---------------------------------------------|-----------------|----------|----------------|--------------|--------------|--------------|--------------|-------------------------------|
| Substrate                                   | Abbr            | Organism | NBD            |              | TMD          |              | SBP          |                               |
| Sugar                                       | ABC-Sga         | MHRHUB1  | MHR_0064       |              | MHR_0065     | MHR_0066     | MHR_0061     | MHR_0062 <br>MHR_0063         |
|                                             |                 | MHP7448  | MHP7448_0369   |              | MHP7448_0370 | MHP7448_0371 | MHP7448_0366 | MHP7448_0367 <br>MHP7448_0368 |
|                                             |                 | MFL27399 | MYF_01550      |              | MYF_01540    | MYF_01545    | MYF_01555    | MYF_01560 <br>MYF_01565       |
| Fructose/<br>Arabinose/<br>Galactose/Xylose | ABC-Fru         | MHRHUB1  | MHR_0163       |              | MHR_0164     |              | MHR_0162     |                               |
|                                             |                 | MHP7448  | MHP7448_0514   |              | MHP7448_0515 |              | MHP7448_0513 |                               |
|                                             |                 | MFL27399 | MYF_00865      |              | MYF_00860    |              | MYF_00870    |                               |
| Maltose/<br>Maltodextrin                    | ABC-Mal         | MHRHUB1  | MHR_0194       |              | MHR_0195     | MHR_0196     | MHR_0487     |                               |
|                                             |                 | MHP7448  |                |              |              |              |              |                               |
|                                             |                 | MFL27399 |                |              |              |              |              |                               |
| Myo-inositol                                | ABC-Myo         | MHRHUB1  |                |              |              |              |              |                               |
|                                             |                 | MHP7448  | MHP7448_0231   |              | MHP7448_0233 |              | MHP7448_0234 |                               |
|                                             |                 | MFL27399 |                |              |              |              |              |                               |
| Glycerol                                    | ABC-Gly         | MHRHUB1  | MHR_0123       |              | MHR_0121     | MHR_0122     | MHR_0276     |                               |
|                                             |                 | MHP7448  | MHP7448_0379   |              | MHP7448_0380 | MHP7448_0381 | MHP7448_0378 |                               |
|                                             |                 | MFL27399 | MYF_01485      |              | MYF_01475    | MYF_01480    | MYF_01490    |                               |
| Peptides                                    | ABC-Pep         | MHRHUB1  | MHR_0319       |              | MHR_0318     |              | MHR_0318     |                               |
|                                             |                 | MHP7448  | MHP7448_0452   |              | MHP7448_0453 |              | MHP7448_0453 |                               |
|                                             |                 | MFL27399 | MYF_01280      |              | MYF_01275    |              | MYF_01275    |                               |
| Oligopeptides 1                             | ABC-Opp1        | MHRHUB1  | MHR_0359       | MHR_0360     | MHR_0361     | MHR_0362     | MHR_0357     |                               |
|                                             |                 | MHP7448  | MHP7448_0215   | MHP7448_0214 | MHP7448_0213 | MHP7448_0212 | MHP7448_0217 |                               |
|                                             |                 | MFL27399 | MYF_02620      | MYF_02615    | MYF_02610    | MYF_02605    | MYF_02595    | MYF_02630                     |
| Oligopeptides 2                             | ABC-Opp2        | MHRHUB1  | MHR_0635       | MHR_0636     | MHR_0637     | MHR_0638     | MHR_0639     |                               |
|                                             |                 | MHP7448  | MHP7448_0501   | MHP7448_0502 | MHP7448_0503 | MHP7448_0504 | MHP7448_0505 |                               |
|                                             |                 | MFL27399 | MYF_00935      | MYF_00930    | MYF_00925    | MYF_00920    | MYF_00915    |                               |
| Nucleosides                                 | ABC-Nucl        | MHRHUB1  | MHR_0073       |              | MHR_0074     | MHR_0075     | MHR_0076     |                               |
|                                             |                 | MHP7448  | MHP7448_0605   |              | MHP7448_0606 | MHP7448_0607 | MHP7448_0604 |                               |
|                                             |                 | MFL27399 | MYF_02910      |              | MYF_02915    | MYF_02920    | MYF_02905    |                               |
| Thiamine/<br>Phosphate/<br>Phosphonate      | ABC-Pi          | MHRHUB1  | MHR_0624       |              | MHR_0623     |              | MHR_0625     |                               |
|                                             |                 | MHP7448  | MHP7448_0361   |              | MHP7448_0362 |              | MHP7448_0360 |                               |
|                                             |                 | MFL27399 | MYF_01410      |              | MYF_01415    |              | MYF_01405    |                               |
| Cobalt                                      | ABC-Co          | MHRHUB1  | MHR_0108       | MHR_0109     | MHR_0110     |              |              |                               |
|                                             |                 | MHP7448  | MHP7448_0263   | MHP7448_0264 | MHP7448_0265 |              |              |                               |
|                                             |                 | MFL27399 | MYF_01890      | MYF_01895    | MYF_01900    |              |              |                               |
| Putrescine/<br>Spermidine                   | ABC-Spd/<br>Put | MHRHUB1  | MHR_0466       |              | MHR_0467     | MHR_0468     |              |                               |
|                                             |                 | MHP7448  | MHP7448_0540   |              | MHP7448_0540 | MHP7448_0541 |              |                               |
|                                             |                 | MFL27399 | MYF_00720      |              | MYF_00715    | MYF_00710    | MYF_00725    |                               |
| Multidrug/Mn/Zn                             | ABC-Mn/Zn       | MHRHUB1  | MHR_0020       |              | MHR_0019     |              |              |                               |
|                                             |                 | MHP7448  | MHP7448_0469   |              | MHP7448_0470 |              |              |                               |
|                                             |                 | MFL27399 | MYF_01155      |              | MYF_01150    |              | MYF_01160    | MYF_01165                     |
| Toxin Secretion                             | ABC-Detox1      | MHRHUB1  | MHR_0310       |              | MHR_0310     |              |              |                               |
|                                             |                 | MHP7448  | MHP7448_0160   |              | MHP7448_0160 |              |              |                               |
|                                             |                 | MFL27399 | MYF_02330      |              | MYF_02330    |              |              |                               |
| Multidrug Efflux                            | ABC-Detox2      | MHRHUB1  | MHP7448_0664   | MHP7448_0665 | MHP7448_0664 | MHP7448_0665 |              |                               |
|                                             |                 | MHP7448  | MHR_0149       | MHR_0150     | MHR_0149     | MHR_0150     |              |                               |
|                                             |                 | MFL27399 | MYF_03280      | MYF_03285    | MYF_03280    | MYF_03285    |              |                               |

\* In yellow: Genes that had not been annotated as part of an ABC transport system;

\* In blue: Gene was already associated to ABC transport system, but a new activity was proposed;

We were able to identify in all species complete putative ABC transporters for multidrug/toxin efflux (ABC-Detox1 and ABC-Detox2) and for import of sugars (ABC-Sga, ABC-Fru), oligopeptides (ABC-Opp1, ABC-Opp2), peptides (ABC-Pep), spermidine/putrescine (ABC-Spd/Put), phosphonate/phosphate/thiamine (ABC-Pi), cobalt (ABC-Co),

manganese/zinc (ABC-Mn/Zn) and glycerol (ABC-Gly). In the search of a possible nucleotide transporter we came across with a work from Nakhyung [Nakhyung2009], in which a system previously annotated as sugar ABC transport was experimentally validated as involved in nucleoside uptake in *M. bovis*. We found similar genes in the genomes of all species (ABC-Nucl). *M. hyopneumoniae* has an extra ABC transporter proposed for myo-inositol (ABC-Myo) and *M. hyorhina* has a unique ABC transport for maltose/maltodextrins (ABC-Mal).

#### PTS:

Phosphotransferase systems are widely spread among bacteria. It consists of two cytoplasmic energy-coupling proteins (enzyme I and phosphocarrier, Fig X) and a range of substrate-specific enzymes II, which catalyze simultaneously phosphorylation and traslocation into the cell. The phosphorylation status of each component is also an indicator of carbohydrate availability and can be used as signals to environmental conditions [Kotrba2001].

A gene coding for enzyme I (EI) and for the phosphocarrier (HPr) were found in all strains from *M. hyorhina*, *M. hyopneumoniae* and *M. flocculare*. Although the gene was not annotated in *M. hyorhina* strain HUB-1, the genomic sequence is present and there is no other gene overlapping the region (table ST2).

Enzymes II (IIA, IIB and IIC) are specific for one or a few given substrates and although most of them are encoded as separate genes, several EII fusions exist [Kotrba2001] (one example is the PTS-Fru in all species studied here, table X). A summarized list of all PTS found in one member of each species is found in table ST3.

Table ST2: Genes coding for PTS general proteins phosphocarrier (HPr) and Enzyme I (EI) in *M. hyorhinis*, *M. flocculare* and *M. hyopneumoniae*.

| Organism        | HPr                       | Enzyme I            |
|-----------------|---------------------------|---------------------|
| <b>MHP168</b>   | MHP168_619                | MHP168_482          |
| <b>MHP168L</b>  | MHP168L_619               | MHP168L_482         |
| <b>MHP232</b>   | mhp_628                   | mhp_470             |
| <b>MHP7422</b>  | MHL_2667                  | MHL_1734            |
| <b>MHP7448</b>  | MHP7448_0609              | MHP7448_0472        |
| <b>MHPJ</b>     | MHJ_0611                  | MHJ_0469            |
| <b>MHRHUB1</b>  | NC_014448[746585..746857] | MHR_0477            |
| <b>MHRGDL1</b>  | MYM_0652                  | MYM_0503            |
| <b>MHRSK76</b>  | MOS_701                   | MOS_540             |
| <b>MRH17981</b> | VBIMycHyo71610_0382       | VBIMycHyo71610_0229 |
| <b>MFL27716</b> | MFC_00378                 | MFC_01092           |
| <b>MFL27399</b> | MYF_02935                 | MYF_01135           |

\* The HPr gene was not annotated in the genome of *M. hyorhinis* strain HUB1 (MHRHUB1), but the genomic sequence is present and conserved (chromosome alignment Supp Fig X, alignment X).

Table ST3: Genes coding for PTS specific enzymes II in *M. hyorhinis*, *M. flocculare* and *M. hyopneumoniae*.

| Systems             |            |          | PTS Components |              |              |
|---------------------|------------|----------|----------------|--------------|--------------|
| Substrate           | Abbr       | Organism | IIA            | IIB          | IIC          |
| Sugar               | PTS-Sga    | MHRHUB1  | MHR_0457       | MHR_0458     | MHR_0459     |
|                     |            | MHP7448  | MHR_0194       | MHR_0195     | MHR_0487     |
|                     |            | MFL27399 | MYF_01515      | MYF_01510    | MYF_01505    |
| Fructose            | PTS-Fru    | MHRHUB1  | MHR_0231       | MHR_0231     | MHR_0231     |
|                     |            | MHP7448  | MHP7448_0492   | MHP7448_0492 | MHP7448_0492 |
|                     |            | MFL27399 | MYF_02570      | MYF_02570    | MYF_02570    |
| Mannitol            | PTS-Mtl    | MHRHUB1  | MHR_0169       |              |              |
|                     |            | MHP7448  | MHP7448_0548   | MHP7448_0550 | MHP7448_0550 |
|                     |            | MFL27399 |                | MYF_02645    | MYF_02645    |
| N-Acetylglucosamine | PTS-GlcNAc | MHRHUB1  |                |              |              |
|                     |            | MHP7448  | MHP7448_0574   | MHP7448_0574 | MHP7448_0574 |
|                     |            | MFL27399 |                | MYF_02765    | MYF_02765    |
| Ascorbate           | PTS-Asc    | MHRHUB1  |                |              |              |
|                     |            | MHP7448  | MHP7448_0554   | MHP7448_0553 | MHP7448_0552 |
|                     |            | MFL27399 | MYF_02665      | MYF_02660    | MYF_02655    |
| Glucose             | PTS-Glc    | MHRHUB1  |                | MHR_0602     |              |
|                     |            | MHP7448  |                | MHP7448_0591 |              |
|                     |            | MFL27399 |                |              |              |

Three complete phospho-transferase transport systems (PTS) were common to all species: one non-specific for sugar (PTS-Sga), one with specificity for fructose (PTS-Fru) and another for mannitol (PTS-Mtl). *M. hyopneumoniae*

and *M. flocculare* also shared two extra complete systems: one for Ascorbate (PTS-Asc) and one for N-acetylglucosamine (PTS-GNAc). *M. hyorhinis* and *M. hyopneumoniae* seem to have an extra IIB component specific for glucose and along with the other components of PTS-Sga were proposed to form a complete glucose PTS (PTS-Glc).

Other transport systems with unknown mechanisms were found throughout the genomes and can be seen in table ST4.

Table ST4: Other genes coding for transport systems in *M. hyorhinis*, *M. hyopneumoniae* and *M. flocculare*.

| Transport Systems     |              |          | Transport Components |              |              |
|-----------------------|--------------|----------|----------------------|--------------|--------------|
| Substrate             | Abbr         | Organism | Gene 1               | Gene 2       | Gene 3       |
| Glycerol              | Gly-F        | MHRHUB1  |                      |              |              |
|                       |              | MHP7448  | MHP7448_0358         |              |              |
|                       |              | MFL27399 | MYF_01395            |              |              |
| Glycerophosphodiester | glpU         | MHRHUB1  | pseudo MHR_0261      |              |              |
|                       |              | MHP7448  | MHP7448_0302         |              |              |
|                       |              | MFL27399 |                      |              |              |
| Nonspecific           | MIF          | MHRHUB1  | MHR_0432             |              |              |
|                       |              | MHP7448  | MHP7448_0136         | MHP7448_0302 |              |
|                       |              | MFL27399 | MYF_02200            |              |              |
| Aminoacids            | Aa-F         | MHRHUB1  | MHR_0146             | MHR_0529     | MHR_0586     |
|                       |              | MHP7448  | MHP7448_0081         | MHP7448_0113 | MHP7448_0357 |
|                       |              | MFL27399 |                      | MYF_00625    | MYF_00390    |
| Cobalt/Magnesium      | CorC         | MHRHUB1  | MHR_0236             |              |              |
|                       |              | MHP7448  | MHP7448_0643         |              |              |
|                       |              | MFL27399 | MYF_03085            |              |              |
| Sodium/Phosphate      | Trans-Na/Pi  | MHRHUB1  | MHR_0250             |              |              |
|                       |              | MHP7448  |                      |              |              |
|                       |              | MFL27399 |                      |              |              |
| Cation ATPase         | Trans-Cation | MHRHUB1  | MHR_0257             |              |              |
|                       |              | MHP7448  | MHP7448_0268         |              |              |
|                       |              | MFL27399 | MYF_01915            |              |              |
| Chromate              | Trans-Chr    | MHRHUB1  | MHR_0326             | MHR_0327     |              |
|                       |              | MHP7448  | MHP7448_0145         | MHP7448_0146 |              |
|                       |              | MFL27399 | MYF_02255            | MYF_02260    |              |
| Magnesium             | Trans-Mg     | MHRHUB1  | MHR_0433             |              |              |
|                       |              | MHP7448  | MHP7448_0487         |              |              |
|                       |              | MFL27399 | MYF_00995            |              |              |
| Sialic Acid           | Trans-SA     | MHRHUB1  | MHR_0451             | MHR_0579     |              |
|                       |              | MHP7448  |                      |              |              |
|                       |              | MFL27399 |                      |              |              |
| Zinc                  | Trans-Zn     | MHRHUB1  | MHR_0598             |              |              |
|                       |              | MHP7448  | MHP7448_0090         |              |              |
|                       |              | MFL27399 | MYF_00480            |              |              |
| Potassium             | Trans-K      | MHRHUB1  | MHR_0650             | MHR_0649     |              |
|                       |              | MHP7448  | MHP7448_0546         | MHP7448_0545 |              |
|                       |              | MFL27399 | MYF_00685            | MYF_00690    |              |

The protein glpU, coded by gene MPN241 in *M. pneumoniae*, was recently described to act on the uptake of glycerophosphodiester [Grosshennig2013]. We found homologs to this gene in all strains of *M. hyopneumoniae* and *M. hyorhinis* adjacent to the gene responsible for the metabolism of these substrates (GlpQ, Table ST5) [pneumoniaeGlpQ]. In *M. hyorhinis* strain HUB-1, the gene was annotated as a pseudo gene.

Table ST5: Genes from the metabolism of glycerophosphodiester are adjacent in genomes of all species analyzed of *M. hyopneumoniae* and *M. hyorhinis*.

|                 | T059 and T102       | R011 and R182       |
|-----------------|---------------------|---------------------|
|                 | GplU                | EC 3.1.4.2 (GlpQ)   |
| <b>MHP168</b>   | MHP168_332          | MHP168_331          |
| <b>MHP168L</b>  | MHP168L_332         | MHP168L_331         |
| <b>MHP232</b>   | mhp316              | mhp317              |
| <b>MHP7422</b>  | MHL_2654            | MHL_1164            |
| <b>MHP7448</b>  | MHP7448_0302        | MHP7448_0303        |
| <b>MHPJ</b>     | MHPJ_0294           | MHJ_0295            |
| <b>MHRHUB1</b>  | pseudo MHR_0261     | MHR_0262            |
| <b>MHRGDL1</b>  | MYM_0324            | MYM_0323            |
| <b>MHRSK76</b>  | MOS_292             | MOS_293             |
| <b>MRH17981</b> | VBIMycHyo71610_0468 | VBIMycHyo71610_0469 |

All species also possess several unspecific amino acid permeases (Aa-F), a glycerol facilitator protein (Gly-F, which is less efficient than ABC-Gly [glpDpneumoniae]) and a major facilitator protein, with unknown specificity (MIF). We could also find common transporters for cobalt and magnesium (CorC), chromate (Trans-Chr), magnesium (Trans-Mg), potassium (Trans-K), zinc (Trans-Zn) and a cation ATPase (Trans-Cation). *M. hyorhinis* had two extra transport systems: one for Sialic Acid (also known as N-Acetyl Neuraminate, Trans-SA) and one sodium phosphate cotransporter (Trans-Na/Pi).

Molecules that diffuse freely across membranes are small and nonpolar. Examples include carbon dioxide, molecular oxygen and nitrogen. Small, polar and uncharged molecules (such as water, ammonia, hydrogen peroxide and urea) can move across the plasma membrane through hydrophilic apertures. [cooper2007cell]. Weak acids also cross the membrane in the uncharged form [Cirillo1993].

As a general rule, enzymes in reduced genomes seem to gain more functions than their homologs in large genomes [Kelkar2013]; and this may be the case for missing transporters in *M. hyorhinis*, *M. hyopneumoniae* and *M. flocculare*.
